# Supplementary material for: Qualitative interview study exploring the early identification and referral of patients with suspected head and neck cancer by community pharmacists in England
Source: HighWire-hosted journal article supplement (doi:10.1136/bmjopen-2022-068607), 2023-03-01
Supplement: bmjopen-2022-068607supp002_data_supplement.pdf [file bmjopen-2022-068607supp002_data_supplement.pdf]

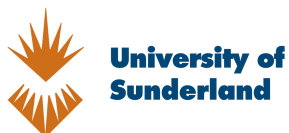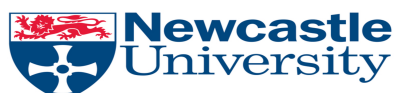

Dr Andrew Sturrock  
School of Pharmacy and Pharmaceutical Sciences  
Faculty of Health Sciences and Wellbeing  
Sciences Complex  
City Campus  
University of Sunderland  
SR1 3SD  
Email: [andrew.sturrock@sunderland.ac.uk](mailto:andrew.sturrock@sunderland.ac.uk)  
Tel: 01915152448

To whom it may concern,

My name is Dr Andrew Sturrock; I am a Principal Lecturer in Pharmacy Practice at the University of Sunderland. I am writing to you as an invitation to take part in an interview study titled "*Early Intervention & Referral of Patients with Head and Neck Cancer*" that I am running in conjunction with Dr Susan Bissett from Newcastle University.

Please find enclosed the participant information sheet, outlining the background to the study and what is required of participants.

Participation can be either via a scheduled telephone appointment or video conference call. If you would like to take part in the study please contact me via email on [andrew.sturrock@sunderland.ac.uk](mailto:andrew.sturrock@sunderland.ac.uk)

Yours faithfully

Andrew Sturrock  
Principal Lecturer– Pharmacy Practice
